# Supplementary material
Source: Springer Nature journal article supplement (https://www.springermedizin.de/resource/supplementary/12963_2011_166_MOESM2_ESM.pdf/9572798)

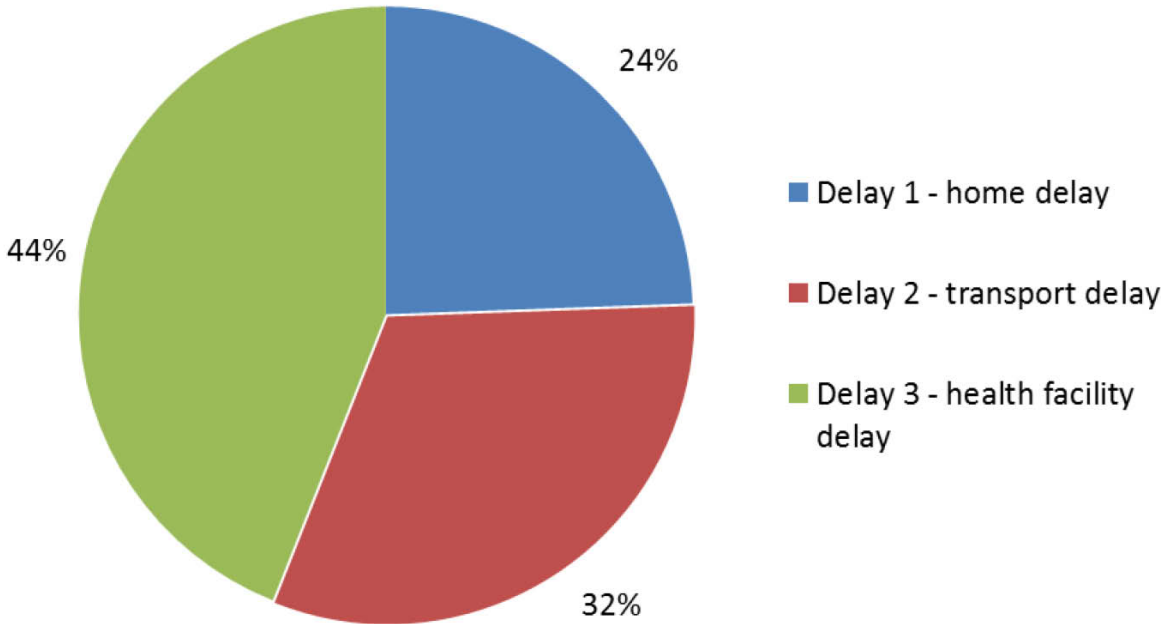

Supplement: MOESM2 [file 9572798]
